# Supplementary material for: Modification of Paper Surface by All-Lignin Coating Formulations
Source: MDPI journal article supplement (doi:10.3390/ma15227869), 2022-11-08
Supplement: s1 [file s1]

## Supplementary Materials

### Modification of paper surface by *all*-lignin coating formulations

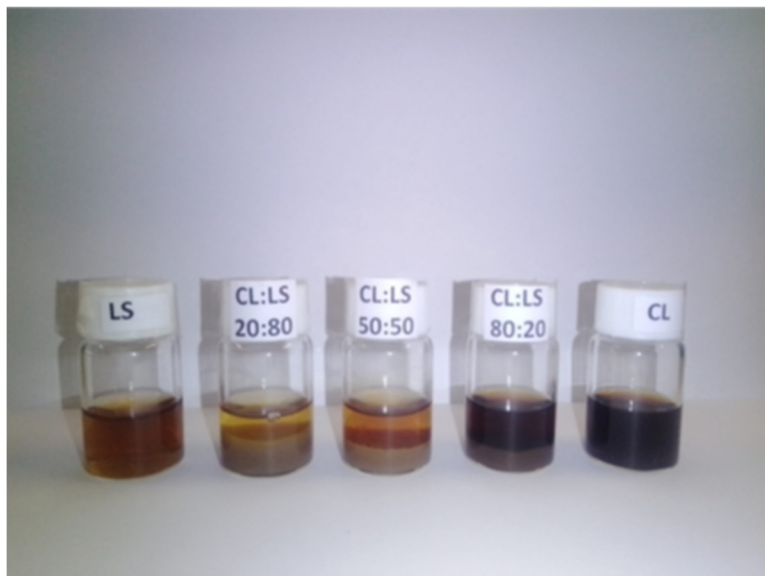

**Figure S1.** Mixtures (v/v) of 1 wt.% solutions of cationic eucalyptus lignin (CL) and eucalyptus lignosulphonates (LS).

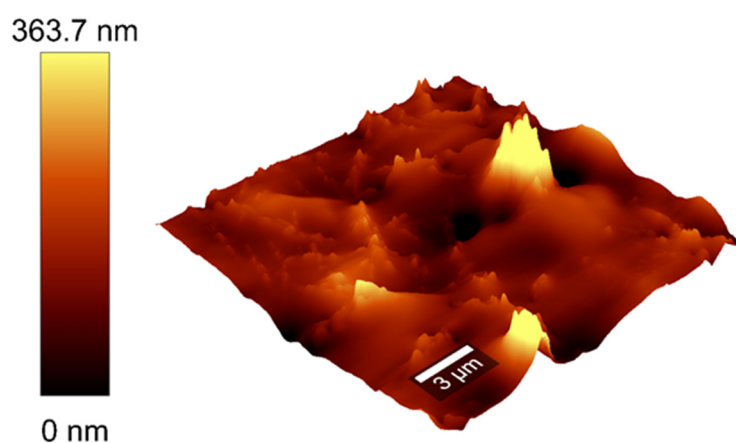

**Figure S2.** 3D AFM surface topology image of the glass lamina coated with CL. The size of image is of 20 x 20 μm.

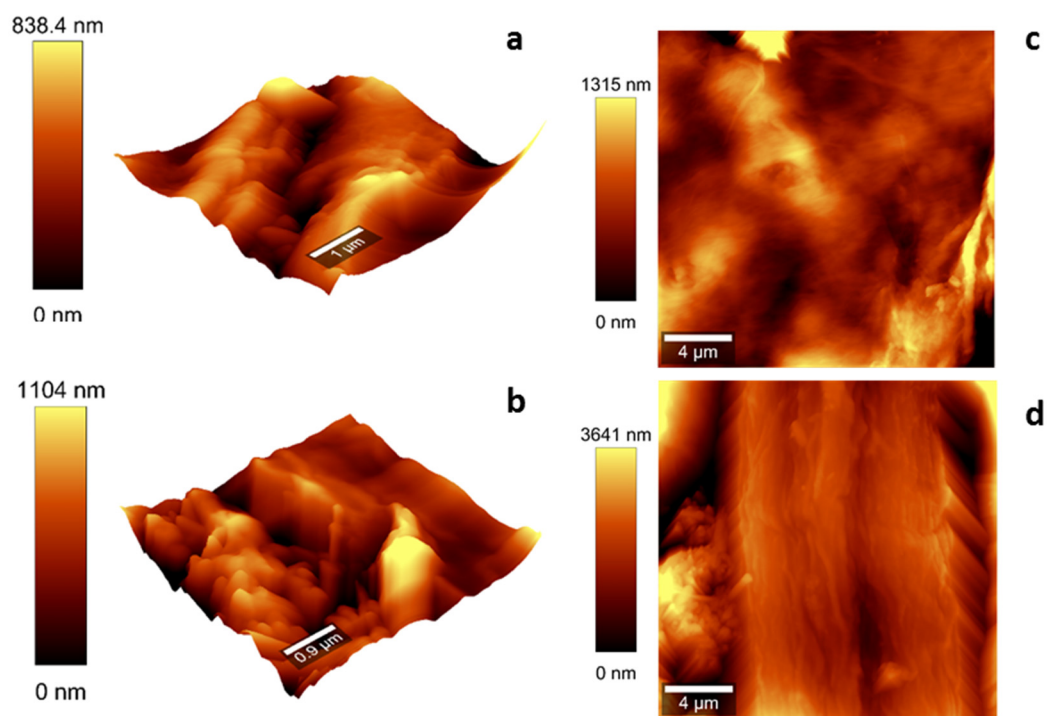

**Figure S3.** 3D (a, b) and 2D (c, d) AFM surface topology images of the uncoated (a, c) and (CL +LS) coated (b, d) industrial paper.
